# Supplementary material for: Characteristics and adsorption behavior of typical microplastics in long-term accelerated weathering simulation
Source: Royal Society of Chemistry journal article supplement (doi:10.1039/d4em00062e), 2024-01-01
Supplement: d4em00062e1.pdf [file d4em00062e1.pdf]

## Electronic Supplementary Information (ESI)

### **Characteristics and adsorption behavior of typical microplastics in long-term accelerated weathering simulation**

Fei Yu<sup>a</sup>, Qiyu Qin<sup>a</sup>, Xiaochen Zhang<sup>a</sup>, Jie M<sup>b,c\*</sup>

<sup>a</sup> College of Oceanography and Ecological Science, Shanghai Ocean University, No 999, Huchenghuan Road, Shanghai, 201306, P. R. China

<sup>b</sup> School of Civil Engineering, Kashi University, Kashi 844000, China

<sup>c</sup> Research Center for Environmental Functional Materials, College of Environmental Science and Engineering, Tongji University, 1239 Siping Road, Shanghai, 200092, P. R. China

Carbonyl index (CI):

CI is defined as the ratio of the peak area of the carbonyl absorption peak to the peak area of the reference peak (methylene). The specific calculation formula is as follows:

$$CI = \frac{C=O(\text{Peak area})}{-CH_2(\text{Peak area})}$$

The spectral range of C=O is 1780-1600  $\text{cm}^{-1}$ , and the peak position of the reference peak methylene (-CH<sub>2</sub>) is 1500-1420  $\text{cm}^{-1}$ .

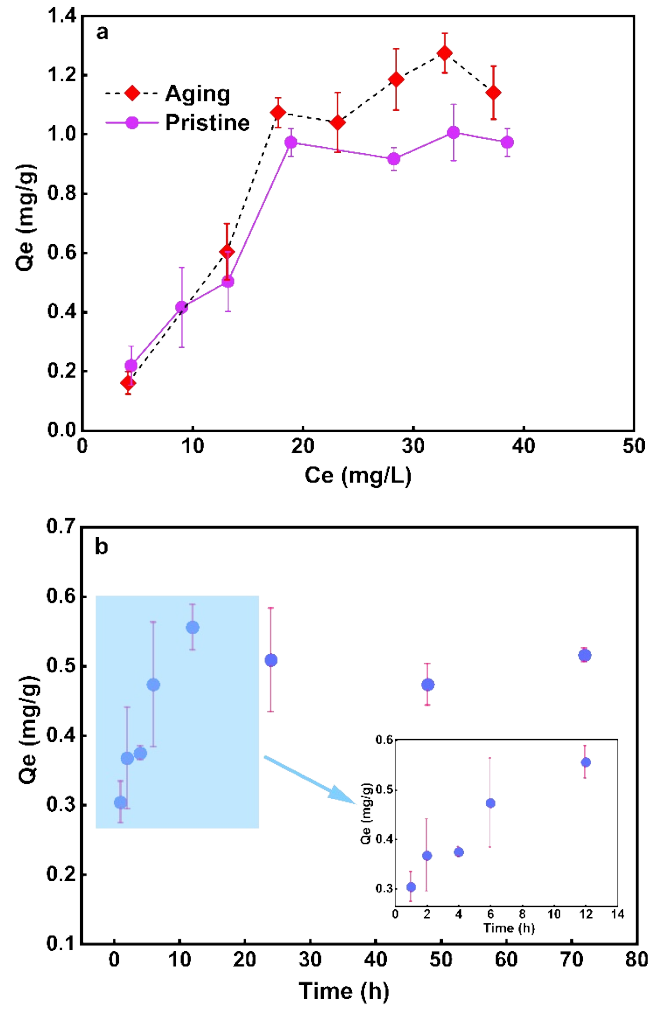

Figure S1. (a) Adsorption OFL isotherm of microplastics PE-125 before and after aging for 60 days, and (b) Adsorption OFL kinetics of PE-125

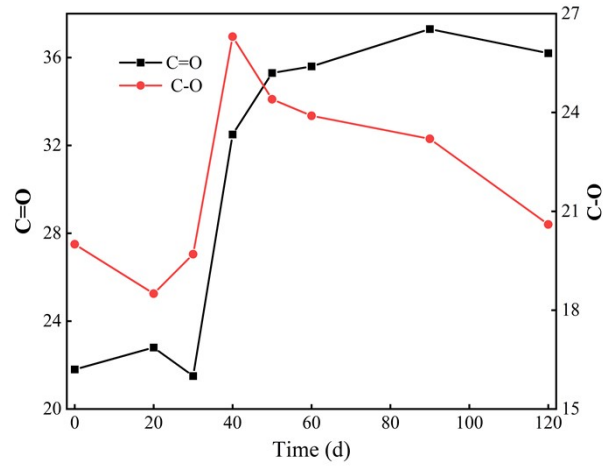

Figure S2. The changes of PBAT oxygen content with weathering time.

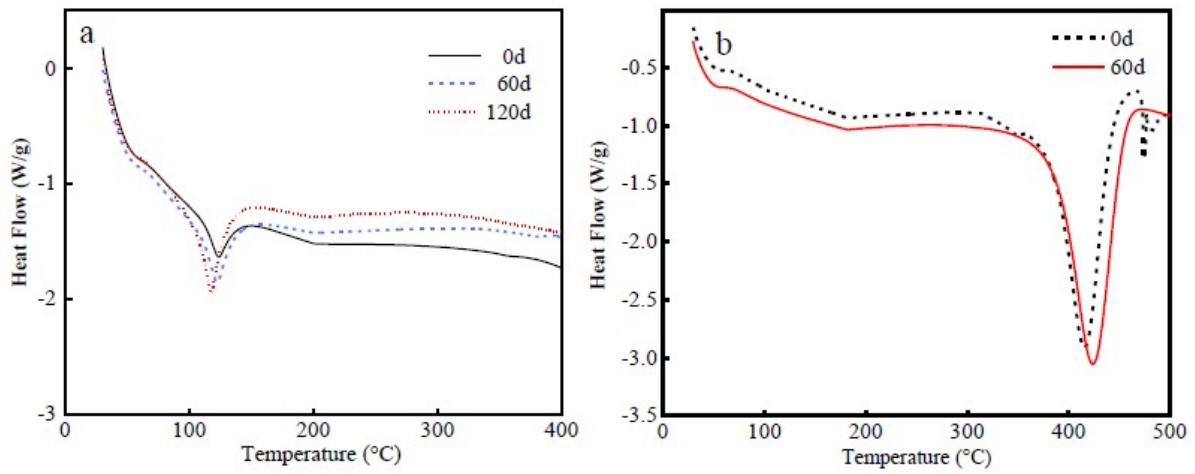

Figure S3. DSC diagrams of PE and PS before and after aging, (a) DSC chart of microplastic PE aging 0, 60, 120 d; (b) DSC chart of PS.

Table S1. The structure of three plastics.

|                                                              |                                                                                                                                                                                                                                |
|--------------------------------------------------------------|--------------------------------------------------------------------------------------------------------------------------------------------------------------------------------------------------------------------------------|
| Polyethylene (PE)                                            | $\text{-(CH}_2\text{-CH}_2\text{)}_n\text{-}$                                                                                                                                                                                  |
| Polystyrene (PS)                                             | $\text{-(CH}_2\text{-CH(C}_6\text{H}_5\text{))}_n\text{-}$                                                                                                                                                                     |
| Poly<br>(butyleneadipate-<br>co-terephthalate)<br><br>(PBAT) | $\text{-(O-CH}_2\text{CH}_2\text{CH}_2\text{CH}_2\text{-O-C(=O)-CH}_2\text{CH}_2\text{CH}_2\text{CH}_2\text{-C(=O)-)}_n\text{-(O-CH}_2\text{CH}_2\text{CH}_2\text{CH}_2\text{-O-C(=O)-C}_6\text{H}_4\text{-C(=O)-)}_m\text{-}$ |

Table S2. Comparison of measured and predicted CI.

| Time(d) | PF-30          |                  |                    | PE-125         |                  |                    |
|---------|----------------|------------------|--------------------|----------------|------------------|--------------------|
|         | measured value | predictive value | Standard Deviation | measured value | predictive value | Standard Deviation |
| a-80    | 0.620          | 0.606            | 0.010              | 1.34           | 1.41             | 0.050              |
| a-90    | 0.753          | 0.710            | 0.030              | 1.83           | 1.70             | 0.091              |
| a-100   | 0.781          | 0.813            | 0.023              | 2.13           | 2.00             | 0.091              |
